# Supplementary material for: SIRT4 is essential for metabolic control and meiotic structure during mouse oocyte maturation
Source: PubMed Central journal article supplement (PMC6052465; doi:10.1111/acel.12789), 2018-05-29
Supplement: ACEL-17-na-s002.pdf [file ACEL-17-na-s002.pdf]

## Supplemental Figure 2

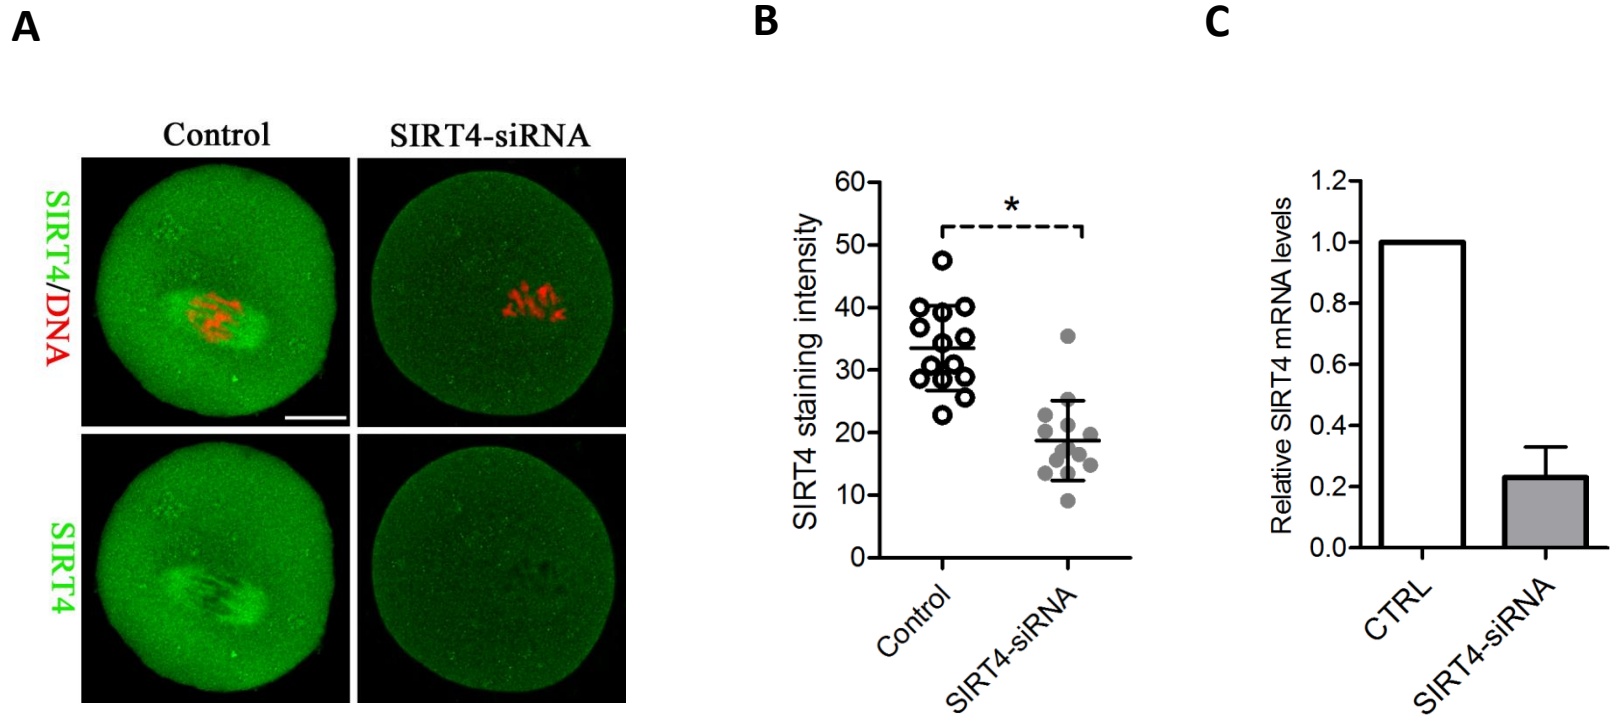

**Figure S2 Effects of siRNA knockdown on SIRT4 staining in oocytes.** (A) Representative confocal sections of control and SIRT4-siRNA injected oocytes stained with anti-SIRT4 antibody (green) and counterstained with propidium iodide (red) for chromosomes are shown. Scale bar, 25  $\mu$ m. (B) Quantification of SIRT4 immunofluorescence shown in A (n = 15 for control and n = 15 for SIRT4-siRNA group). (C) The relative mRNA levels in control and SIRT4-siRNA injected oocytes. Experiments were repeated three times and results are mean  $\pm$  SD. \*, P < 0.05.
